# Supplementary material for: Genetic Architecture of Abdominal Pigmentation in Drosophila melanogaster
Source: PubMed Central journal article supplement (PMC4416719; doi:10.1371/journal.pgen.1005163), 2015-05-01

**T5**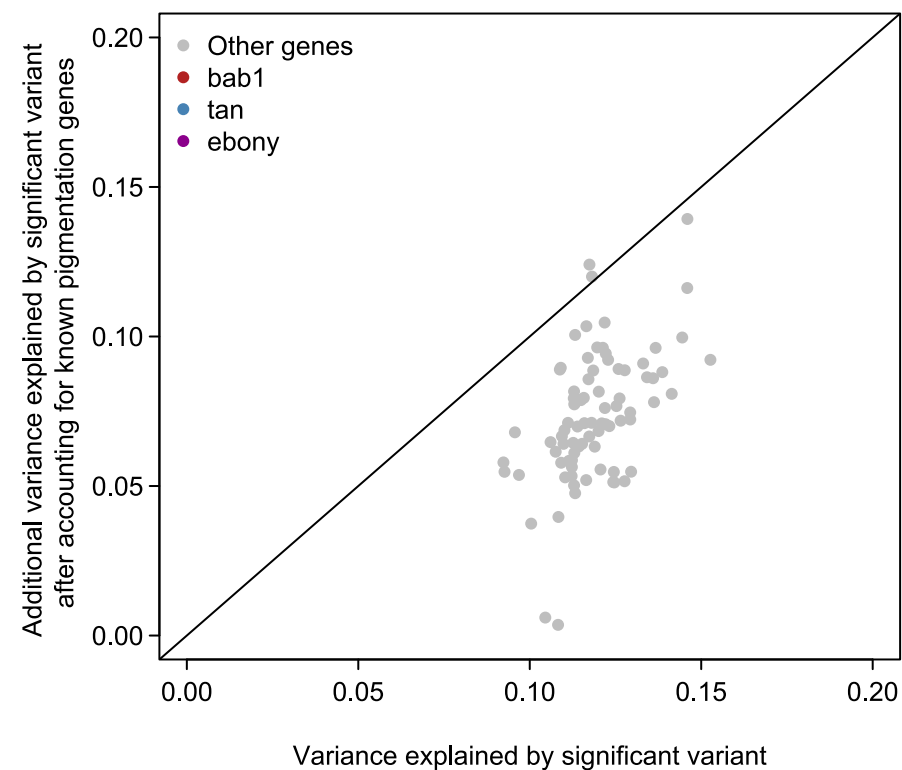**T6**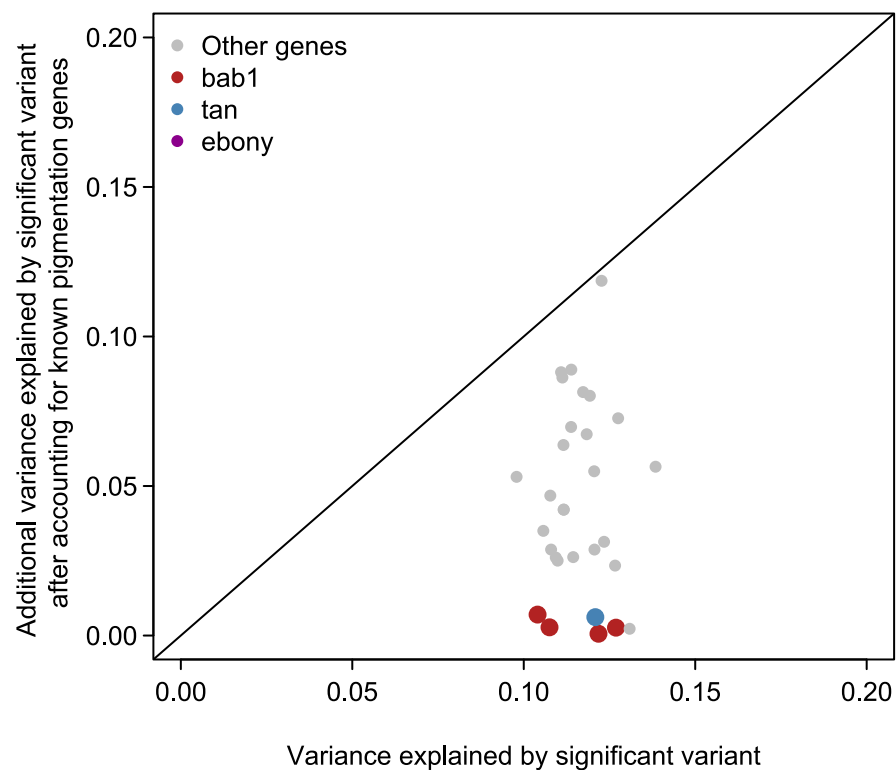**(T5 + T6)/2**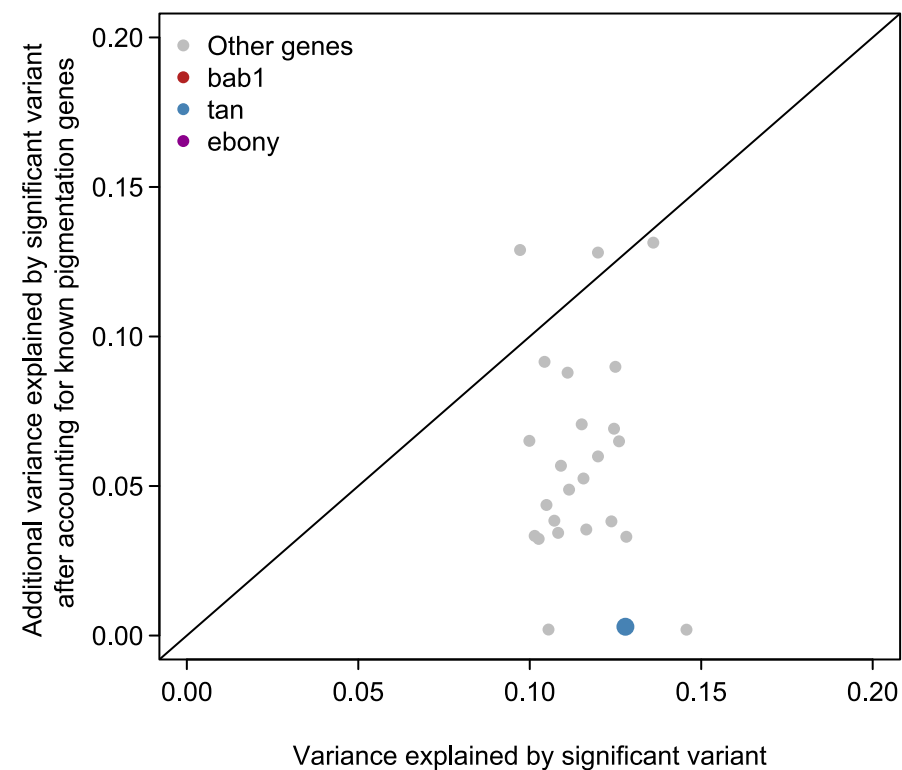**T5 - T6**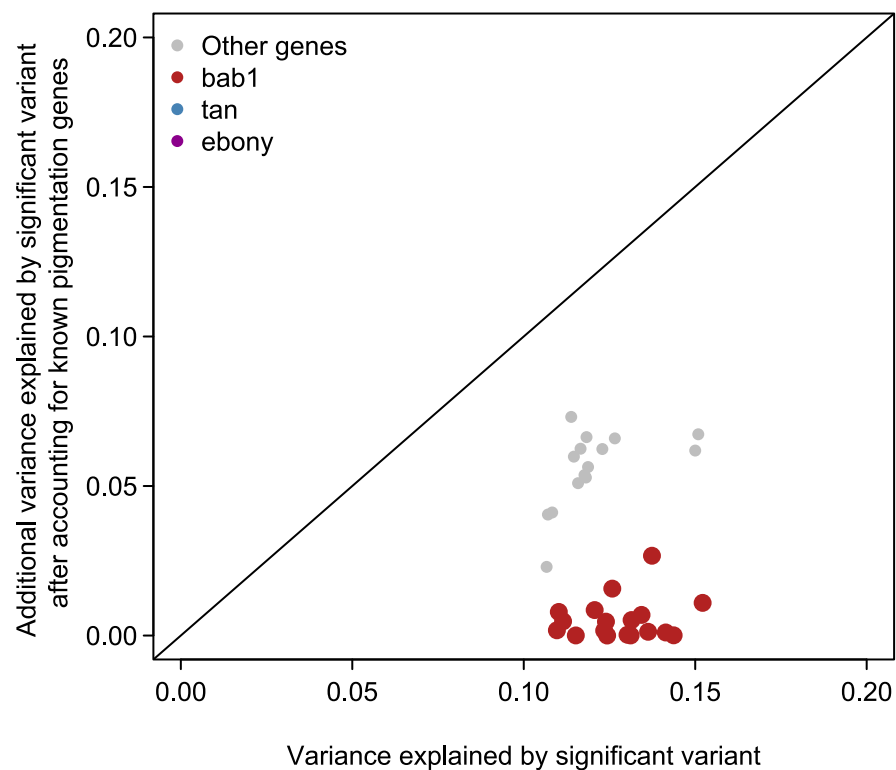

Supplement: pgen.1005163.s002.pdf [file pgen.1005163.s002.pdf]
